# Supplementary material for: Physical therapy for patients with low back pain in Germany: a survey of current practice
Source: Springer Nature journal article supplement (doi:10.1186/s12891-021-04422-2), 2021-06-19
Supplement: MOESM2 [file 19275362]

Please note: This English language version is a direct translation of the original questionnaire without any form of cultural adaptation.

Dear Participants,

Thank you very much for your interest in our online survey on “Physical therapy for patients with low back pain in Germany.”

### **What is the study about?**

We would like to ask you a few questions about the following four subject areas:

1. General demographic and occupational information
2. Contents and scope of the physical therapeutic diagnostic process of patients with acute and chronic low back pain
3. Contents and recommendations for the treatment of patients with acute and chronic low back pain
4. Knowledge and application of clinical practice guidelines in the physical therapy practice

### **What is the aim of the study?**

The aim of the study is to evaluate the current physical therapy management of patients with low back pain in Germany with regard to the recommendations of the National Disease Management Guideline (NVL) “Non-specific low back pain”, 2nd edition.

### **How much time does it take to participate?**

Participation in the online survey takes about **15 minutes**.

### **What happens with my data?**

The gathered data will be kept under lock and key and be published only in anonymised form for scientific purposes.

### **What are the risks?**

The survey is not associated with any risks.

**Your participation in this study is voluntary. If you decide to take part, you are still free to withdraw yourself and your data from the study without giving a reason. You are not obligated to answer all questions and you can stop the survey at any time.**

### **Data Privacy Statement**

§ I grant my consent to the recording of the data gathered in the course of the study on electronic data carriers and their storing in pseudonymised form\* for scientific analysis at the data gathering and analysis centre\*\*.

§ Furthermore, I also consent to an authorised agent of the ethics committee, who is obligated for confidentiality, accessing my personal data, which is available at the data gathering and analysis centre\*\*, insofar as this is necessary for the validation of the study. For these measures, I release the data gathering and analysis centre from its confidentiality obligation.

§ I am informed that I can withdraw from the study at any time without this causing any negative effects for me.

\* Pseudonymisation means replacing the name and other identifying characteristics by a code for the purpose of preventing the identification of the data subject or making this significantly more difficult (Sec. 3 (6a) BDSG [German Federal Data Protection Act]).

\*\* Prof. Dr Christian Kopkow, University of Applied Sciences, Department of Applied Health Sciences, Gesundheitscampus 6-8, 44801 Bochum

I have understood the participant information on the study “Physical therapy for patients with low back pain in Germany” and I consent to participate in the study and to the pseudonymised recording and analysis of my data, the transfer the data to others and the examination of my personal data in the form described above.

Click “**Continue**” to participate in the study.

## Note

Please note that the survey must be completed in one go to prevent the loss of data (**it is not possible to save the results to temporary storage**). We also want to inform you that as soon as you click on “Continue”, you **cannot** return to the previous page of the survey.

Therefore, please take enough time to read the following questions and answer them to the best of your knowledge and belief.

Thank you very much for participating in this important study!

## I. General demographic and occupational information

### 1. How old are you?

\_\_\_ years  No answer

### 2. What is your gender?

Male  Female  Other  No answer

### 3. In what type of practice do you work?

*(Multiple answers are allowed)*

- Private practice
- Hospital
- Rehabilitation clinic
- Other: \_\_\_\_\_
- No answer

### 4. In what federal state of Germany do you work?

[please select]

### 5. How many inhabitants live in the town (or municipality) of your workplace?

*If you have more than one place of work, please answer this question with regard to the workplace where you work most of the time.*

- <5,000 inhabitants (rural area)
- 5,000 - 20,000 inhabitants (small town)
- 20,000 - 100,000 inhabitants (mid-sized town)
- > 100,000 inhabitants (large town)
- No answer

### 6. Are you:

*If you have more than one place of work as physical therapist, please answer this question with regard to your primary employment.*

- Employee/worker
- Self-employed
- Other
- No answer

*(Note: Questions 7 and 8 only appear if question 6 was answered with "Employee/worker".)*

### 7. What is your current employment contract situation?

- Permanent employment
- Fixed-term employment
- No answer

### 8. How many colleagues work with you in a team?

*(only physical therapists)*

\_\_\_\_ colleagues  No answer

*(Note: Question 9 only appears if question 6 was answered with "Self-employed".)*

**9. How many employees work in your team?**

\_\_\_\_ employees  No answer

**10. How many hours per week do you work as physical therapist?**

\_\_\_\_ hours/week  No answer

**11. Where did you complete your vocational training?**

- Vocational school
- University
- Other (e.g. university abroad, occupational degree programme, ...)
- No answer

**12. Which of the following degrees have you attained in the field of healthcare to date?**

*(Multiple answers are allowed)*

- Diploma (vocational school)
- Diploma (university)
- Bachelor
- Master
- Doctorate
- No answer

**13. How many years have you worked as a physical therapist?**

\_\_\_\_ year(s)  No answer

**14. How many new patients with low back pain do you usually see during one week?**

\_\_\_\_ patients per week  No answer

**15. Have you completed one or more of the following advanced trainings?**

*(Multiple answers are allowed)*

- Manual therapy (MT)
- Orthopaedic manual therapy (OMT)
- Healing practitioner
- Osteopathy
- Back school

- Pain management physiotherapy
- Other: \_\_\_\_\_ (Please indicate only advanced trainings with relevance for back pain.)
- None
- No answer

**16. Are you engaged in direct communication with other healthcare professionals at your organisation (physicians, psychologists, occupational therapists, ...)?**

- Yes             No             No answer

*(Note: Questions 17 only appears if question 16 was answered with "Yes".)*

**17. With which professional groups do you communicate at your workplace?**

***(Multiple answers are allowed)***

- Physicians
- Psychotherapists
- Nursing staff
- Occupational therapists
- Other: \_\_\_\_\_
- No answer

**18. How much time do you have available in the course of a normal workday for each of the following activities?**

Initial physical therapeutic diagnostic: \_\_\_\_\_ min             No answer

Treatment: \_\_\_\_\_ min             No answer

## II. Physical therapeutic diagnostic process

### 19. Do you differentiate between acute and chronic low back pain?

*Acute low back pain summarises newly occurring pain episodes, which persist for less than six weeks. Chronic low back pain refers to back pain, which persists for more than twelve weeks.*

- Yes
- No
- No answer

### 20. Do you conduct an initial physical therapeutic diagnostic process?

- Yes
- No
- No answer

*(Note: Question 21 only appears if question 20 was answered with "Yes".)*

### 21. Do you evaluate medical history?

- Yes
- No
- No answer

### 22. Do you ask about pain characteristics (e.g. localisation, beginning, course, ...)?

- Yes
- No
- No answer

*(Note: Question 23 only appears if question 22 was answered with "Yes".)*

### 23. Which characteristics do you ask about?

***(Multiple answers are allowed)***

- Localisation and radiation
- Beginning
- Provoking, aggravating or relieving factors
- Progression over time (of the day)
- Limitations in daily activities
- Previous episodes
- No answer

*(Note: Question 24 only appears if question 21 was answered with “Yes”.)*

**24. Do you ask about extra-spinal causes?**

*Extra-spinal causes are defined as pain in the area of the lumbar region that is triggered by neighbouring organs, which are not directly part of the osseous, muscular or spinal ligament structures (e.g. caused by an aortic aneurysm).*

- Yes
- No
- No answer

*(Note: Question 25 only appears if question 24 was answered with “Yes”.)*

**25. Which extra-spinal causes do you ask about?**

***(Multiple answers are allowed)***

- Abdominal and visceral processes (e.g. pancreatitis)
- Vascular injuries (e.g. aortic aneurysms)
- Gynaecological causes (e.g. endometriosis)
- Urological causes (e.g. urolithiasis)
- Neurological diseases (e.g. polyneuropathy)
- Psychosomatic and psychiatric disorders
- No answer

*(Note: Questions 26, 27 and 28 only appear if question 21 was answered with “Yes”.)*

**26. Do you ask about “red flags”?**

*“Red flags” are defined as signs and suspicions on a specific aetiology of low back pain, which require clarification and therapy by a physician soon and, if necessary, on an emergency basis.*

- Yes
- No
- No answer

**27. Do you ask about “yellow flags”?**

*“Yellow flags” are defined as psychosocial factors, which increase the risk of the low back pain becoming chronic and which play a decisive role in the course of the condition.*

- Yes
- No



No answer

**28. Do you ask about “blue” and “black flags”?**

*“Blue” and “black flags” are defined as factors specific to the workplace, which influence the development of chronic low back pain.*

Yes

No

No answer

*(Note: Questions 29, 30 and 31 only appear if questions 26, 27 and 28 were answered with “Yes”.)*

**29. When you ask for “red flags”, which of the following pathologies do you consider?**

***(Multiple answers are allowed)***

Fracture/osteoporosis

Infection

Radiculopathies/neuropathies

Tumour/metastases

Axial spondyloarthritis

No answer

**30. Which “yellow flags” do you ask about?**

***(Multiple answers are allowed)***

Depressiveness/distress (negative stress)

Pain-related cognitions (e.g. fear-avoidance beliefs, catastrophizing)

Passive pain behaviour (e.g. strong tendency to spare oneself and avoidance behaviour)

Overactive pain behaviour (task persistence)

Pain-related cognitions (thought suppression)

Tendency toward somatisation (occurrence of physical ailments, which have no organic cause but which have psychological causes)

No answer

**31. Which “blue” and “black flags” do you ask about?**

***Multiple answers are allowed***

Predominantly heavy physical labour

Predominantly monotonous body posture

Predominantly exposure to vibrations

- unskilled work
- Little influence on the arrangement of work
- Little social support
- Work dissatisfaction
- Loss of employment
- Offensive work relationships, harassment
- Own negative expectation as relates to returning to the job
- Fear of repeated degradation on the job
- No answer

*(Note: Question 32 only appears if question 21 was answered with "Yes".)*

**32. Do you ask about further risk factors for chronification (e.g. poor physical fitness)?**

- Yes
- No
- No answer

*(Note: Question 33 only appears if question 32 was answered with "Yes".)*

**33. Which further risk factors do you ask about?**

*(Multiple answers are allowed)*

**Iatrogenic factors**

*These are defined to mean the manipulation of patients' beliefs and their handling of the illness based on the beliefs and attitudes of the treating physicians and therapists.*

- Insufficient respect for a multifactorial causality
- Overestimating somatic/radiologic findings in the case of non-specific pain
- prolonged sick leave that is hard to justify
- Promoting passive therapy concepts
- Excessive use of diagnostic procedures

**Other factors**

- Smoking
- Obesity
- Poor physical fitness
- Alcohol

No answer

*(Note: Question 34 only appears if question 20 was answered with "Yes".)*

**34. Do you conduct a physical examination (consisting, e.g., of an inspection, palpation and other tests)?**

Yes

No

No answer

*(Note: Question 35 only appears if question 34 was answered with "Yes".)*

**35. Do you conduct an inspection?**

Yes

No

No answer

*(Note: Question 36 only appears if question 35 was answered with "Yes".)*

**36. Which aspects do you consider in the inspection?**

*(Multiple answers are allowed)*

General condition

Physical impairments

Posture

Pelvic stand

Deformities

Signs of injury

Skin

No answer

*(Note: Questions 37, 38, 39, 40 and 41 only appears if question 34 was answered with "Yes".)*

**37. Do you conduct a palpation (of local musculature and the secondarily afflicted musculature for pain sensation and tension)?**

Yes

No

No answer

**38. Do you test local tenderness of the spinal process on pressure or percussion (in case of a suspected fracture)?**

Yes

No

No answer

**39. Do you carry out an orienting movement testing (anteflexion, retroflexion, lateral flexion of the lumbar spine)?**

Yes

No

No answer

**40. Do you test the straight leg raise and carry out the Bragard test in addition?**

*Testing the straight leg raise is understood to mean an exam for radiculopathy or nerve flexion: flashing pain in the buttocks and leg triggered suddenly by flexing the sciatic nerve when raising the straight leg passively (positive indication of the straight leg raise). The Bragard Test includes additionally the passive dorsal extension in the ankle of the foot.*

Yes

No

No answer

**41. Do you examine the sacroiliac joint?**

Yes

No

No answer

*(Note: Question 42 only appears if question 41 was answered with "Yes".)*

**42. Which exams of the sacroiliac joint do you conduct?**

***(Multiple answers are allowed)***

Local pain palpation

Pain provocation by compression of the joint

No answer

*(Note: Question 43 only appears if question 34 was answered with "Yes".)*

**43. Do you conduct further exam measures?**

- Yes, which ones \_\_\_\_\_
- No
- No answer

*(Note: Question 44 only appears if question 34 was answered with "Yes".)*

**44. In case of suspected radicular symptoms, do you additionally conduct a neurological examination?**

- Yes
- No
- No answer

*(Note: Question 45 only appears if question 44 was answered with "Yes".)*

**45. Do you evaluate the muscle strength to detect paresis?**

- Yes
- No
- No answer

*(Note: Question 46 only appears if question 45 was answered with "Yes".)*

**46. Which tests of the muscle strength do you carry out to detect paresis?**

***(Multiple answers are allowed)***

- Dorsal extension of the big toe (L5)
- Dorsal flexion of the foot in the ankle joint (L4 and L5)
- Plantar flexion of the foot in the ankle joint (S1)
- Knee extension (L2-4)
- Hip adduction and flexion against resistance (L1-4)
- No answer

*(Note: Questions 47 and 48 only appear if question 44 was answered with "Yes".)*

**47. Do you check for sensory disorder by gently brushing the skin on the lower extremities and the buttocks region?**

- Yes
- No

No answer

**48. Do you test the muscle reflexes?**

Yes

No

No answer

*(Note: Question 49 only appears if question 48 was answered with "Yes".)*

**49. Which muscle reflexes do you test?**

***(Multiple answers are allowed)***

Hamstring reflex (S1)

Patellar reflex (L2-4)

Babinski reflex (differentiation from central lesions)

No answer

### III. Treatment

#### 50. Do you treat patients with low back pain?

- Yes
- No
- No answer

*(Note: Question 51 only appears if question 50 was answered with "Yes".)*

#### 51. Which of the following treatment modalities do you use for patients with acute low back pain or which treatment recommendations do you communicate to the patient?

*Acute low back pain summarises newly occurring pain episodes, which persist for less than six weeks.*

|                                                           | Never                 | Sometimes             | Often                 | Always                | No answer             |
|-----------------------------------------------------------|-----------------------|-----------------------|-----------------------|-----------------------|-----------------------|
| Acupuncture                                               | <input type="radio"/> | <input type="radio"/> | <input type="radio"/> | <input type="radio"/> | <input type="radio"/> |
| <b>Exercise and exercise therapy</b>                      | <input type="radio"/> | <input type="radio"/> | <input type="radio"/> | <input type="radio"/> | <input type="radio"/> |
| → Strength training                                       |                       |                       |                       |                       |                       |
| → Endurance training                                      |                       |                       |                       |                       |                       |
| Bed rest                                                  | <input type="radio"/> | <input type="radio"/> | <input type="radio"/> | <input type="radio"/> | <input type="radio"/> |
| Relaxation techniques<br>(progressive muscle relaxation)  | <input type="radio"/> | <input type="radio"/> | <input type="radio"/> | <input type="radio"/> | <input type="radio"/> |
| Interference therapy                                      | <input type="radio"/> | <input type="radio"/> | <input type="radio"/> | <input type="radio"/> | <input type="radio"/> |
| Kinesio taping                                            | <input type="radio"/> | <input type="radio"/> | <input type="radio"/> | <input type="radio"/> | <input type="radio"/> |
| Short-wave diathermy                                      | <input type="radio"/> | <input type="radio"/> | <input type="radio"/> | <input type="radio"/> | <input type="radio"/> |
| Laser therapy                                             | <input type="radio"/> | <input type="radio"/> | <input type="radio"/> | <input type="radio"/> | <input type="radio"/> |
| Magnetic field therapy                                    | <input type="radio"/> | <input type="radio"/> | <input type="radio"/> | <input type="radio"/> | <input type="radio"/> |
| <b>Manual therapy</b>                                     | <input type="radio"/> | <input type="radio"/> | <input type="radio"/> | <input type="radio"/> | <input type="radio"/> |
| → Spinal manipulation                                     |                       |                       |                       |                       |                       |
| → Spinal mobilisation                                     |                       |                       |                       |                       |                       |
| Massage                                                   | <input type="radio"/> | <input type="radio"/> | <input type="radio"/> | <input type="radio"/> | <input type="radio"/> |
| <b>Medical aids</b>                                       | <input type="radio"/> | <input type="radio"/> | <input type="radio"/> | <input type="radio"/> | <input type="radio"/> |
| → Orthoses                                                |                       |                       |                       |                       |                       |
| → Orthopedic insoles                                      |                       |                       |                       |                       |                       |
| Percutaneous electrical nerve stimulation (PENS)          | <input type="radio"/> | <input type="radio"/> | <input type="radio"/> | <input type="radio"/> | <input type="radio"/> |
| Rehabilitation sport and functional training              | <input type="radio"/> | <input type="radio"/> | <input type="radio"/> | <input type="radio"/> | <input type="radio"/> |
| Back school (according to a bio-physical-social approach) | <input type="radio"/> | <input type="radio"/> | <input type="radio"/> | <input type="radio"/> | <input type="radio"/> |
| <b>Thermotherapy</b>                                      | <input type="radio"/> | <input type="radio"/> | <input type="radio"/> | <input type="radio"/> | <input type="radio"/> |
| → Cold therapy                                            |                       |                       |                       |                       |                       |
| → Heat therapy                                            |                       |                       |                       |                       |                       |
| Ultrasound therapy                                        | <input type="radio"/> | <input type="radio"/> | <input type="radio"/> | <input type="radio"/> | <input type="radio"/> |
| Instrumental traction                                     | <input type="radio"/> | <input type="radio"/> | <input type="radio"/> | <input type="radio"/> | <input type="radio"/> |
| Transcutaneous electrical nerve stimulation (TENS)        | <input type="radio"/> | <input type="radio"/> | <input type="radio"/> | <input type="radio"/> | <input type="radio"/> |
| Behavioural therapy                                       | <input type="radio"/> | <input type="radio"/> | <input type="radio"/> | <input type="radio"/> | <input type="radio"/> |

(Note: Question 52 only appears if question 50 was answered with “Yes”.)

**52. Which of the following treatment methods do you use for patients with chronic low back pain or which treatment recommendations do you communicate to the patient?**

*Chronic low back pain summarises back pain, which persists for more than twelve weeks.*

|                                                                                     | Never                 | Sometimes             | Often                 | Always                | No answer             |
|-------------------------------------------------------------------------------------|-----------------------|-----------------------|-----------------------|-----------------------|-----------------------|
| Acupuncture                                                                         | <input type="radio"/> | <input type="radio"/> | <input type="radio"/> | <input type="radio"/> | <input type="radio"/> |
| <b>Exercise and exercise therapy</b><br>→ Strength training<br>→ Endurance training | <input type="radio"/> | <input type="radio"/> | <input type="radio"/> | <input type="radio"/> | <input type="radio"/> |
| Bed rest                                                                            | <input type="radio"/> | <input type="radio"/> | <input type="radio"/> | <input type="radio"/> | <input type="radio"/> |
| Relaxation techniques<br>(progressive muscle relaxation)                            | <input type="radio"/> | <input type="radio"/> | <input type="radio"/> | <input type="radio"/> | <input type="radio"/> |
| Interference therapy                                                                | <input type="radio"/> | <input type="radio"/> | <input type="radio"/> | <input type="radio"/> | <input type="radio"/> |
| Kinesio taping                                                                      | <input type="radio"/> | <input type="radio"/> | <input type="radio"/> | <input type="radio"/> | <input type="radio"/> |
| Short-wave diathermy                                                                | <input type="radio"/> | <input type="radio"/> | <input type="radio"/> | <input type="radio"/> | <input type="radio"/> |
| Laser therapy                                                                       | <input type="radio"/> | <input type="radio"/> | <input type="radio"/> | <input type="radio"/> | <input type="radio"/> |
| Magnetic field therapy                                                              | <input type="radio"/> | <input type="radio"/> | <input type="radio"/> | <input type="radio"/> | <input type="radio"/> |
| <b>Manual therapy</b><br>→ Spinal manipulation<br>→ Spinal mobilisation             | <input type="radio"/> | <input type="radio"/> | <input type="radio"/> | <input type="radio"/> | <input type="radio"/> |
| Massage                                                                             | <input type="radio"/> | <input type="radio"/> | <input type="radio"/> | <input type="radio"/> | <input type="radio"/> |
| <b>Medical aids</b><br>→ Orthoses<br>→ Orthopedic insoles                           | <input type="radio"/> | <input type="radio"/> | <input type="radio"/> | <input type="radio"/> | <input type="radio"/> |
| Percutaneous electrical nerve stimulation (PENS)                                    | <input type="radio"/> | <input type="radio"/> | <input type="radio"/> | <input type="radio"/> | <input type="radio"/> |
| Rehabilitation sport and functional training                                        | <input type="radio"/> | <input type="radio"/> | <input type="radio"/> | <input type="radio"/> | <input type="radio"/> |
| Back school (according to a bio-physical-social approach)                           | <input type="radio"/> | <input type="radio"/> | <input type="radio"/> | <input type="radio"/> | <input type="radio"/> |
| <b>Thermotherapy</b><br>→ Cold therapy<br>→ Heat therapy                            | <input type="radio"/> | <input type="radio"/> | <input type="radio"/> | <input type="radio"/> | <input type="radio"/> |
| Ultrasound therapy                                                                  | <input type="radio"/> | <input type="radio"/> | <input type="radio"/> | <input type="radio"/> | <input type="radio"/> |
| Instrumental traction                                                               | <input type="radio"/> | <input type="radio"/> | <input type="radio"/> | <input type="radio"/> | <input type="radio"/> |
| Transcutaneous electrical nerve stimulation (TENS)                                  | <input type="radio"/> | <input type="radio"/> | <input type="radio"/> | <input type="radio"/> | <input type="radio"/> |
| Behavioural therapy                                                                 | <input type="radio"/> | <input type="radio"/> | <input type="radio"/> | <input type="radio"/> | <input type="radio"/> |



## IV. Guidelines

### 53. Do you use recommendations from guidelines in your clinical practice as a physical therapist?

*Guidelines are defined as systematically developed, scientifically reasoned and practice-relevant aids for making decisions on the appropriate approach to specific health conditions.*

- Yes
- No
- No answer

*(Note: Question 54 only appears if question 53 was answered with "Yes".)*

### 54. Do you discuss the recommendations from guidelines with your patients?

- Yes
- No
- No answer

### 55. Do you know the National Versorgungsleitlinie [National Care Guideline] ("NVL") Non-specific pack pain, 2nd edition (link to the NVL: <http://www.leitlinien.de/nvl/kreuzschmerz>) and have dealt with its recommendations, respectively?

*The link opens a new window.*

- Yes
- No
- No answer

*(Note: Questions 56 and 57 only appear if question 53 was answered with "No".)*

### 56. For what reasons?

***(Multiple answers are allowed)***

- Recommendations from guidelines are not helpful to improve the patient care
- Recommendations from guidelines contradict my own clinical expertise
- Using guidelines is not supported at my workplace
- Recommendations from guidelines are not suitable given the individuality of the patients
- Recommendations from guidelines are hindrances to my decision-making
- I have no time to read guidelines
- I do not know where I can find guidelines
- Other: \_\_\_\_\_

No answer

**57. Do you have a general interest in considering recommendations from guidelines in your daily work with patients?**

Yes

No

No answer

**58. How have you first heard of this survey?**

Employer

Friends and acquaintances

Colleagues

Call for participants in the association network

Call for participants in social media

Call for participants in a magazine

Information from the University of Applied Sciences in Bochum

Other: \_\_\_\_\_

**59. You have the opportunity here to add remarks, comments or criticism about the study:**

\_\_\_\_\_

**Thank you very much for your participation!**

We would like to thank you very much for your help.

Your answers have been saved and you can now close the browser window.
